# Supplementary material for: Ultrasensitive and Highly Stretchable Multiple-Crosslinked Ionic Hydrogel Sensors with Long-Term Stability
Source: PubMed Central journal article supplement (PMC9931967; doi:10.1007/s40820-023-01015-7), 2023-02-15
Supplement: 40820_2023_1015_MOESM1_ESM.pdf [file 40820_2023_1015_MOESM1_ESM.pdf]

Supporting Information for

## Ultrasensitive and Highly Stretchable Multiple-Crosslinked Ionic Hydrogel Sensors with Long-Term Stability

Jin-Young Yu<sup>1</sup>, Seung Eon Moon<sup>2</sup>, Jeong Hun Kim<sup>2,\*</sup>, and Seong Min Kang<sup>1,\*</sup>

<sup>1</sup>Department of Mechanical Engineering, Chungnam National University, Daejeon 34134, Korea

<sup>2</sup>Emerging Nano-Materials Research Section, Electronics and Telecommunications Research Institute, Daejeon 305-700, Republic of Korea

\*Corresponding authors. E-mail: [smkang@cnu.ac.kr](mailto:smkang@cnu.ac.kr) (Seong Min Kang), [jeonghun@etri.re.kr](mailto:jeonghun@etri.re.kr) (Jeong Hun Kim)

### Supplementary Figures and Tables

**Fig. S1** Hydrogel composition

| Recipe | Monomer | SBMA  | AAM   |
|--------|---------|-------|-------|
| #1     | g       | 0.000 | 1.200 |
|        | m       | 0.000 | 5.627 |
| #2     | g       | 0.276 | 1.129 |
|        | m       | 0.329 | 5.298 |
| #3     | g       | 0.553 | 1.059 |
|        | m       | 0.660 | 4.967 |
| #4     | g       | 0.838 | 0.986 |
|        | m       | 1.000 | 4.627 |
| #5     | g       | 1.106 | 0.918 |
|        | m       | 1.320 | 4.307 |

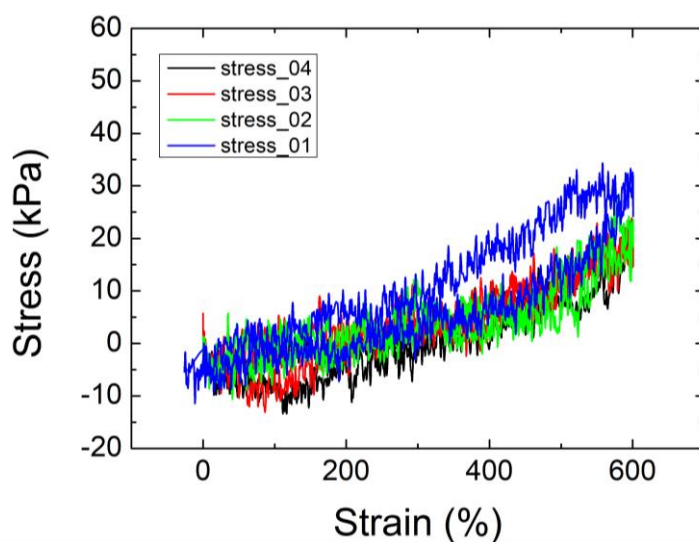

**Fig. S2** #4 Stress–strain curve. Reciprocating stress was measured for a strain of up to approximately 600%

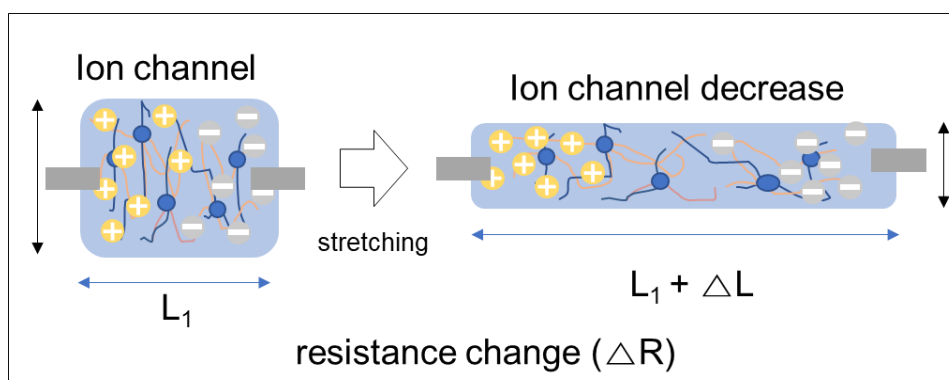

**Fig. S3** Principle of hydrogel strain sensor

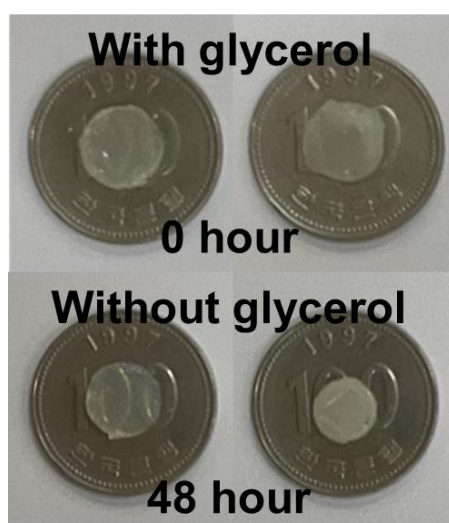

**Fig. S4** Volume change of hydrogel #4 and hydrogel #4 with glycerol removed over 48 h

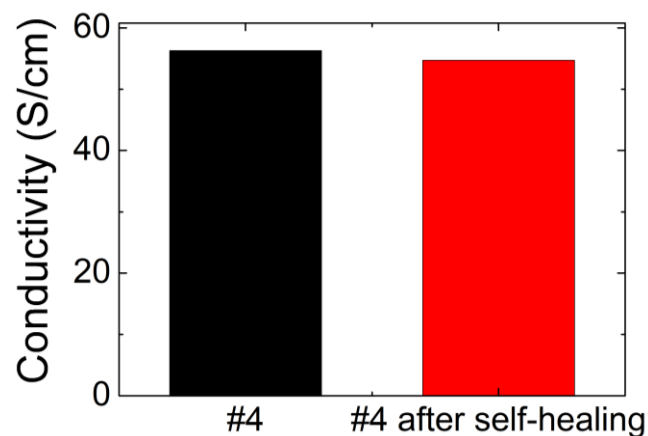

**Fig. S5** Conductivity of hydrogel #4 before and after self-healing

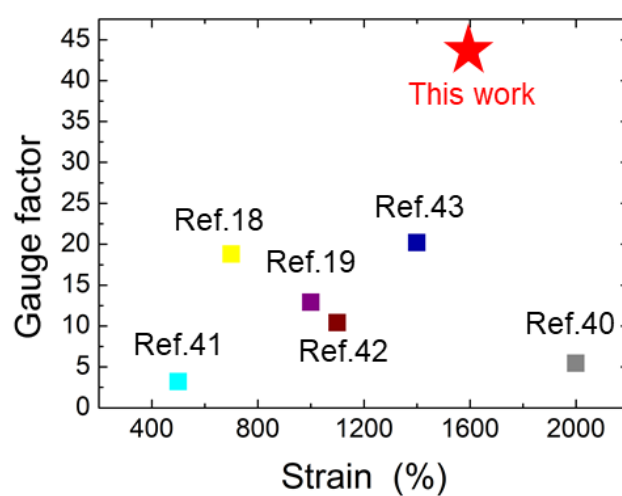

**Fig. S6** Comparison of GFs of multiple-crosslinked P(SBMA-co-Aam) hydrogel sensors at different strain with those previously reported sensors

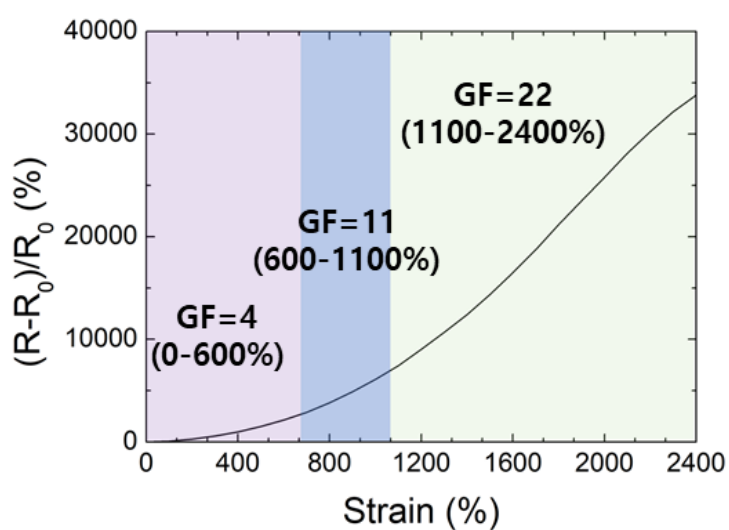

**Fig. S7** GF of multiple-crosslinked P(SBMA-co-AAm) #1 hydrogel sensors at different strain sections
